# Supplementary material for: Methicillin-Resistant Staphylococcus aureus Carriage among Neonate Mothers, Healthcare Workers, and Environmental Samples in Neonatal Intensive Care Units: A Systematic Review
Source: Hindawi journal article supplement (doi:10.1155/2024/5675786), 2024-04-08
Supplement: f1 [file 5675786.f1.pdf]

## Supplementary Materials

Table S1: Search strategy

| Database                    |    | Search done on January 5 <sup>th</sup> , 2023                                                                                                                                                                                                                                                                                                                      | Items  |
|-----------------------------|----|--------------------------------------------------------------------------------------------------------------------------------------------------------------------------------------------------------------------------------------------------------------------------------------------------------------------------------------------------------------------|--------|
| <b>Medline (Ovid)</b>       | 1  | exp Methicillin-Resistant Staphylococcus aureus/                                                                                                                                                                                                                                                                                                                   | 19041  |
|                             | 2  | (Methicillin-Resistant Staphylococcus aureus or MRSA).mp.                                                                                                                                                                                                                                                                                                          | 34351  |
|                             | 3  | exp Sepsis/ or exp Neonatal Sepsis/ or exp Bacteremia/ or exp Endotoxemia/ or exp Shock, Septic/ or exp Hemorrhagic Septicemia/                                                                                                                                                                                                                                    | 139775 |
|                             | 4  | (Sepsis or Neonatal Sepsis or Bacteremia or Endotoxemia or Shock, Septic or Hemorrhagic Septicemia or Bloodstream Infection or Bloodstream Infections or Pyemia or Pyemias or Pyohemia or Pyohemias or Pyaemia or Pyaemias or Septicemia or Septicemias or Blood Poisoning or Blood Poisonings or Severe Sepsis).mp.                                               | 193563 |
|                             | 5  | exp Intensive Care Units, Neonatal/                                                                                                                                                                                                                                                                                                                                | 17833  |
|                             | 6  | (Newborn Intensive Care Unit or Newborn Intensive Care Units or Neonatal Intensive Care Unit or Neonatal Intensive Care Units or NICU or Neonatal ICU or Neonatal ICUs or Newborn ICU or Newborn ICUs).mp.                                                                                                                                                         | 24242  |
|                             | 7  | 1 or 2                                                                                                                                                                                                                                                                                                                                                             | 34351  |
|                             | 8  | 3 or 4                                                                                                                                                                                                                                                                                                                                                             | 211811 |
|                             | 9  | 5 or 6                                                                                                                                                                                                                                                                                                                                                             | 30453  |
|                             | 10 | 7 and 8 and 9                                                                                                                                                                                                                                                                                                                                                      | 102    |
| <b>Embase (Ovid)</b>        | 1  | exp methicillin resistant Staphylococcus aureus/                                                                                                                                                                                                                                                                                                                   | 55373  |
|                             | 2  | (methicillin resistant Staphylococcus aureus or MRSA).mp.                                                                                                                                                                                                                                                                                                          | 73152  |
|                             | 3  | exp bacteremia/ or exp bloodstream infection/ or exp endotoxemia/ or exp hemorrhagic septicemia/ or exp newborn sepsis/ or exp pyemia/ or exp sepsis/ or exp septic shock/ or exp septicemia/ or exp staphylococcal bacteremia/                                                                                                                                    | 350333 |
|                             | 4  | (bacteremia or blood poisoning or blood poisonings or bloodstream infection or bloodstream infections or endotoxemia or hemorrhagic septicemia or neonatal sepsis or newborn sepsis or pyaemia or pyaemias or pyemia or pyemias or pyohemia or pyohemias or sepsis or septic shock or septicemia or septicemias or severe sepsis or staphylococcal bacteremia).mp. | 402811 |
|                             | 5  | exp neonatal intensive care unit/ or exp newborn intensive care/                                                                                                                                                                                                                                                                                                   | 48134  |
|                             | 6  | (neonatal intensive care unit or newborn intensive care or Newborn Intensive Care Units or Neonatal Intensive Care Unit or Neonatal Intensive Care Units or NICU or Neonatal ICU or Neonatal ICUs or Newborn ICU or Newborn ICUs).mp.                                                                                                                              | 63228  |
|                             | 7  | 1 or 2                                                                                                                                                                                                                                                                                                                                                             | 73153  |
|                             | 8  | 3 or 4                                                                                                                                                                                                                                                                                                                                                             | 415821 |
|                             | 9  | 5 or 6                                                                                                                                                                                                                                                                                                                                                             | 63228  |
|                             | 10 | 7 and 8 and 9                                                                                                                                                                                                                                                                                                                                                      | 328    |
| <b>Global Health (Ovid)</b> | 1  | (Methicillin-Resistant Staphylococcus aureus or methicillin resistant Staphylococcus aureus or MRSA).mp.                                                                                                                                                                                                                                                           | 22121  |
|                             | 2  | (bacteremia or blood poisoning or blood poisonings or bloodstream infection or bloodstream infections or endotoxemia or hemorrhagic septicemia or neonatal sepsis or newborn sepsis or pyaemia or pyaemias or pyemia or pyemias or pyohemia or pyohemias or sepsis or septic                                                                                       | 62406  |

|                       |   |                                                                                                                                                                                                                                                                                                                                                                                                                                                                                                                                                                                                                                                 |      |
|-----------------------|---|-------------------------------------------------------------------------------------------------------------------------------------------------------------------------------------------------------------------------------------------------------------------------------------------------------------------------------------------------------------------------------------------------------------------------------------------------------------------------------------------------------------------------------------------------------------------------------------------------------------------------------------------------|------|
|                       |   | shock or septicemia or septicemias or severe sepsis or staphylococcal bacteremia).mp.                                                                                                                                                                                                                                                                                                                                                                                                                                                                                                                                                           |      |
|                       | 3 | (Neonatal ICU or Neonatal ICUs or neonatal intensive care unit or Neonatal Intensive Care Units or Newborn ICU or Newborn ICUs or Newborn Intensive Care Unit or Newborn Intensive Care Units or newborn intensive care or NICU).mp.                                                                                                                                                                                                                                                                                                                                                                                                            | 6472 |
|                       | 4 | 1 and 2 and 3                                                                                                                                                                                                                                                                                                                                                                                                                                                                                                                                                                                                                                   | 71   |
|                       |   |                                                                                                                                                                                                                                                                                                                                                                                                                                                                                                                                                                                                                                                 |      |
| <b>Web of Science</b> | 1 | Topic = (((Methicillin-Resistant Staphylococcus aureus OR methicillin resistant Staphylococcus aureus OR MRSA) AND (bacteremia or blood poisoning or blood poisonings or bloodstream infection or bloodstream infections or endotoxemia or hemorrhagic septicemia or neonatal sepsis or newborn sepsis or pyaemia or pyaemias or pyemia or pyemias or pyohemia or pyohemias or sepsis or septic shock or septicemia or septicemias or severe sepsis or staphylococcal bacteremia)) AND (Neonatal ICU OR neonatal intensive care unit OR Newborn ICU OR Newborn Intensive Care Unit OR newborn intensive care OR NICU)) AND (Newborn OR Neonate) | 109  |

Table S2: Items for risk of bias assessment

|                                                                                                                                                      | Yes (1) | No (0) | Unclear (0) | Not applicable (0) |
|------------------------------------------------------------------------------------------------------------------------------------------------------|---------|--------|-------------|--------------------|
| 1. Was the study's target population a close representation of the national population in relation to relevant variables, e.g. age, sex, occupation? |         |        |             |                    |
| 2. Was the sampling frame a true or close representation of the target population?                                                                   |         |        |             |                    |
| 3. Was some form of random selection used to select the sample, OR was a census undertaken?                                                          |         |        |             |                    |
| 4. Was the likelihood of non-response bias minimal?                                                                                                  |         |        |             |                    |
| 5. Were data collected directly from the subjects (as opposed to a proxy)?                                                                           |         |        |             |                    |
| 6. Was an acceptable case definition used in the study?                                                                                              |         |        |             |                    |
| 7. Was the study instrument that measured the parameter of interest shown to have reliability and validity (if necessary)?                           |         |        |             |                    |
| 8. Was the same mode of data collection used for all subjects?                                                                                       |         |        |             |                    |
| 9. Was the length of the shortest prevalence period for the parameter of interest appropriate?                                                       |         |        |             |                    |
| 10. Were the numerator(s) and denominator(s) for the parameter of interest appropriate?                                                              |         |        |             |                    |
| Summary item on the overall risk of study bias                                                                                                       |         |        |             |                    |
| Interpretation of the risk of bias tool                                                                                                              |         |        |             |                    |

- 7-10: Low risk of bias
- 4-6: Moderate risk of bias
- 0-3: High risk of bias

Table S3: Individual characteristics of included studies

| Authors              | Countries    | Study period         | Samples categories                                                                                                                                                                                                                                          | Reason to test for colonization                                   | Microbiological methods                             | Sample types     | No. of participants | No. of participants with MRSA | Proportion positive [95 % CI] |
|----------------------|--------------|----------------------|-------------------------------------------------------------------------------------------------------------------------------------------------------------------------------------------------------------------------------------------------------------|-------------------------------------------------------------------|-----------------------------------------------------|------------------|---------------------|-------------------------------|-------------------------------|
| Adil A et al., 2010  | Saudi Arabia | Sep/2005-May/2006    | Nurses and Physicians                                                                                                                                                                                                                                       | Screening of staff members who are in close contact with patients | Culture; Disk diffusion method.                     | Nasal/ Nares     | 340                 | 2                             | 0.59 [0.07; 2.11]             |
| Bhatta et al., 2021  | India        | Unclear/Not reported | Ambu bag, Bedside locker, BP Machine, Door handles, Hood box, Incubator, Laryngoscope, Mothers' bed, Phototherapy bed, Radiant warmer, Station counter, Sterilizer, Stethoscope, Suction tip, Telephone set, Ventilator, Wall BPL monitor, Weighing machine | Routine surveillance study                                        | Culture; Disk diffusion method using cefoxitin      | Surfaces sampled | 146                 | 6                             | 4.11 [ 1.52; 8.73]            |
| Darwish et al., 2022 | Jordan       | Unclear/Not reported | doctors and nurses                                                                                                                                                                                                                                          | Routine surveillance study                                        | Culture; Disk diffusion method using cefoxitin, PCR | Nasal/ Nares     | 43                  | 12                            | 27.91 [15.33; 43.67]          |
| Darwish et al., 2022 | Jordan       | Unclear/Not reported | Neonate mothers                                                                                                                                                                                                                                             | Routine surveillance study                                        | Culture; Disk diffusion method using cefoxitin, PCR | Nasal/ Nares     | 72                  | 7                             | 9.72 [4.00; 19.01]            |

|                            |                          |                      |                                                                                                                                                         |                                                                  |                                            |                       |     |    |                      |
|----------------------------|--------------------------|----------------------|---------------------------------------------------------------------------------------------------------------------------------------------------------|------------------------------------------------------------------|--------------------------------------------|-----------------------|-----|----|----------------------|
| Davies et al., 2000        | Australia                | Unclear/Not reported | Toys                                                                                                                                                    | Routine surveillance study                                       | Culture                                    | Surfaces sampled      | 34  | 13 | 38.24 [22.17; 56.44] |
| Denkel et al., 2014        | Germany                  | May/2012-Jun/2013    | Neonate mothers                                                                                                                                         | Screening due to pre-partum hospitalization for premature labour | Culture (API20E system)                    | Nasal/ Nares          | 198 | 1  | 0.51 [0.01; 2.78]    |
| Doudoulakakis et al., 2022 | Greece                   | Jan/2014-Dec/2018    | Medical doctor (general), Nurse                                                                                                                         | Post-outbreak investigation.                                     | Culture, EUCAST guidelines using cefoxitin | Nasal/ Nares          | 37  | 6  | 16.22 [6.19; 32.01]  |
| Fujimura et al., 2004      | Japan                    | Jan/2001-Jun/2001    | HCWs                                                                                                                                                    | Response to ongoing detection of MRSA in symptomatic neonates.   | Culture, PCR                               | Nasal/ Nares          | 14  | 7  | 50.00 [23.04; 76.96] |
| Fujimura et al., 2004      | Japan                    | Jan/2001-Jun/2001    | Incubator, Sheet, Chart, Nasogastric tube, Floor, Doorknob, Tap, Bath, Table/chair, Telephone, Switch, Cart, Scale, Stethoscope, White coat, Stationary | Response to ongoing detection of MRSA in febrile neonates.       | Culture, PCR                               | Nasal/ Nares          | 85  | 45 | 52.94 [41.81; 63.87] |
| Gad et al., 2021           | Egypt                    | Jan/2019-Dec/2019    | Neonate mothers                                                                                                                                         | Screening due to preterm neonate admission.                      | Culture                                    | Expressed breast milk | 118 | 2  | 1.69 [0.21; 5.99]    |
| Keilman et al., 2021       | United States of America | Unclear/Not reported | Baby Isolette Station, Communal Equipment, and Physical Plant                                                                                           | Routine surveillance study                                       | Culture                                    | Surfaces sampled      | 46  | 5  | 10.87 [ 3.62; 23.57] |
| Li et al., 2017 (baseline) | China, Hong              | Jan/2009-Dec/2013    | environmental surfaces of patient zone, including cot rails, stethoscope,                                                                               | Pre- and post-intervention study for                             | Culture, PCR                               | Surfaces sampled      | 100 | 44 | 44.00 [34.08; 54.28] |

|                                                                         |                      |                      |                                                                                                                                        |                                                            |                                                |                                              |     |    |                      |  |
|-------------------------------------------------------------------------|----------------------|----------------------|----------------------------------------------------------------------------------------------------------------------------------------|------------------------------------------------------------|------------------------------------------------|----------------------------------------------|-----|----|----------------------|--|
| period (no intervention))                                               | Kong SAR             |                      | infant incubator, monitor, syringe pumps, and drawer handles                                                                           | cleaning measures                                          |                                                |                                              |     |    |                      |  |
| Li et al., 2017 (intervention (environmental cleaning measures) period) | China, Hong Kong SAR | Jan/2009-Dec/2013    | environmental surfaces of patient zone, including cot rails, stethoscope, infant incubator, monitor, syringe pumps, and drawer handles | Pre- and post-intervention study for cleaning measures     | Culture, PCR                                   | Surfaces sampled                             | 800 | 20 | 2.50 [ 1.53; 3.83]   |  |
| Nubel et al., 2013                                                      | Germany              | Feb/2010-Aug/2010    | HCWs                                                                                                                                   | Routine surveillance study                                 | Culture, PCR                                   | Nasopharyngeal                               | 160 | 2  | 1.25 [0.15; 4.44]    |  |
| Okedo-Alex et al., 2020                                                 | Nigeria              | Unclear/Not reported | HCWs                                                                                                                                   | Routine surveillance study                                 | Culture; Disk diffusion method using cefoxitin | Nasal/ Nares, Fingernail                     | 51  | 9  | 17.65 [8.40; 30.87]  |  |
| Richter et al., 2018                                                    | Germany              | 2016                 | HCWs                                                                                                                                   | Staff testing followed increased rate of MSSA colonization | Culture                                        | Buccal, Nasal/ Nares                         | 128 | 2  | 1.56 [0.19; 5.53]    |  |
| Sakai et al., 2020                                                      | Brazil               | Jan2014-Feb2018      | Neonate mothers                                                                                                                        | Routine surveillance study                                 | Culture, Disk diffusion method CLSI guidelines | Axilla, Nasal/ Nares, Rectum, Inguinal, Oral | 433 | 6  | 1.39 [0.51; 2.99]    |  |
| Singh et al., 2018                                                      | India                | Unclear/Not reported | Outer surface of the patients' files                                                                                                   | Routine surveillance study                                 | Culture, Disk diffusion method CLSI guidelines | Surfaces sampled                             | 70  | 0  | 0.00 [ 0.00; 5.13]   |  |
| Thomas et al., 2019 (Pre Intervention (Hand hygiene), Before Hand Wash) | India                | Jul/2013-Aug/2013    | Medical doctor (general), Nurse,                                                                                                       | Pre- and post-hand hygiene intervention study              | Culture                                        | Hands                                        | 34  | 9  | 26.47 [12.88; 44.36] |  |
| Thomas et al., 2019 (Pre Intervention                                   | India                | Jul/2013-Aug/2013    | Medical doctor (general), Nurse,                                                                                                       | Pre- and post-hand hygiene                                 | Culture                                        | Hands                                        | 34  | 8  | 23.53 [10.75; 41.17] |  |

|                                                                          |       |                   |                                  |                                               |         |       |    |   |                    |  |
|--------------------------------------------------------------------------|-------|-------------------|----------------------------------|-----------------------------------------------|---------|-------|----|---|--------------------|--|
| (Hand hygiene), After Hand Wash)                                         |       |                   |                                  | intervention study                            |         |       |    |   |                    |  |
| Thomas et al., 2019 (Post Intervention (Hand hygiene), Before Hand Wash) | India | Jul/2013-Aug/2013 | Medical doctor (general), Nurse, | Pre- and post-hand hygiene intervention study | Culture | Hands | 34 | 0 | 0.00 [0.00; 10.28] |  |
| Thomas et al., 2019 (Post Intervention (Hand hygiene), After Hand Wash)  | India | Jul/2013-Aug/2013 | Medical doctor (general), Nurse, | Pre- and post-hand hygiene intervention study | Culture | Hands | 34 | 0 | 0.00 [0.00; 10.28] |  |

Table S4: Risk of bias assessment

| Author, Year (Year of publication) | Was the study's target population a close representation of the national population in relation to MRSA | Was the sampling frame a true or close representation of the target population? | Was some form of random selection used to select the sample, OR was acensus undertaken? | Were data collected directly from the subjects (as opposed to a proxy)? | Was an acceptable inclusion criteria definition used in the study? | Did the author calculate and respect the expected sample size? | Was the MRSA detection assay shown to have reliability and validity? | Was the same mode of data collection used for all subjects? | Was the length of the study period > or = 1 year? | Were the numerator(s) and denominator(s) for the MRSA prevalence? | Risk of bias | Study participants |
|------------------------------------|---------------------------------------------------------------------------------------------------------|---------------------------------------------------------------------------------|-----------------------------------------------------------------------------------------|-------------------------------------------------------------------------|--------------------------------------------------------------------|----------------------------------------------------------------|----------------------------------------------------------------------|-------------------------------------------------------------|---------------------------------------------------|-------------------------------------------------------------------|--------------|--------------------|
|------------------------------------|---------------------------------------------------------------------------------------------------------|---------------------------------------------------------------------------------|-----------------------------------------------------------------------------------------|-------------------------------------------------------------------------|--------------------------------------------------------------------|----------------------------------------------------------------|----------------------------------------------------------------------|-------------------------------------------------------------|---------------------------------------------------|-------------------------------------------------------------------|--------------|--------------------|

|                     | prevalence? |     |     |                |     |    |     |     |         |     |                       |                             |
|---------------------|-------------|-----|-----|----------------|-----|----|-----|-----|---------|-----|-----------------------|-----------------------------|
| Adil A, 2010        | No          | Yes | No  | Yes            | Yes | No | Yes | Yes | No      | Yes | Moderate risk of bias | HCWs                        |
| Bhatta, 2021        | No          | Yes | No  | Not applicable | Yes | No | Yes | Yes | Unclear | Yes | Moderate risk of bias | Environmental samples       |
| Darwish, 2022       | No          | Yes | No  | Yes            | Yes | No | Yes | Yes | Unclear | Yes | Moderate risk of bias | HCWs; Neonate mothers       |
| Davies, 2000        | No          | Yes | No  | Not applicable | Yes | No | Yes | Yes | No      | Yes | Moderate risk of bias | Environmental samples       |
| Denkel, 2014        | No          | Yes | No  | Yes            | Yes | No | Yes | Yes | Yes     | Yes | Low risk of bias      | Neonate mothers             |
| Doudoulakakis, 2022 | No          | Yes | No  | Yes            | Yes | No | Yes | Yes | Yes     | Yes | Low risk of bias      | HCWs                        |
| Fujimura, 2004      | No          | Yes | No  | Yes            | Yes | No | Yes | Yes | No      | Yes | Moderate risk of bias | HCWs; Environmental samples |
| Gad, 2021           | No          | Yes | No  | Yes            | Yes | No | Yes | Yes | Yes     | Yes | Low risk of bias      | Neonate mothers             |
| Keilman, 2021       | No          | Yes | No  | Not applicable | Yes | No | Yes | Yes | No      | Yes | Moderate risk of bias | Environmental samples       |
| Li, 2017            | No          | Yes | No  | Not applicable | Yes | No | Yes | Yes | Yes     | Yes | Moderate risk of bias | Environmental samples       |
| Nubel, 2013         | No          | Yes | No  | Yes            | Yes | No | Yes | Yes | No      | Yes | Moderate risk of bias | HCWs                        |
| Okedo-Alex, 2020    | No          | Yes | No  | Yes            | Yes | No | No  | Yes | Unclear | Yes | Moderate risk of bias | HCWs                        |
| Richter, 2018       | No          | Yes | No  | Yes            | Yes | No | Yes | Yes | No      | Yes | Moderate risk of bias | HCWs                        |
| Sakai, 2020         | No          | Yes | No  | Yes            | Yes | No | Yes | Yes | Yes     | Yes | Low risk of bias      | Neonate mothers             |
| Singh, 2018         | No          | Yes | Yes | Not applicable | Yes | No | Yes | Yes | No      | Yes | Moderate risk of bias | Environmental samples       |



|                 |    |     |    |     |     |    |     |     |    |     |                          |      |
|-----------------|----|-----|----|-----|-----|----|-----|-----|----|-----|--------------------------|------|
| Thomas,<br>2019 | No | Yes | No | Yes | Yes | No | Yes | Yes | No | Yes | Moderate risk<br>of bias | HCWs |
|-----------------|----|-----|----|-----|-----|----|-----|-----|----|-----|--------------------------|------|

Figure S1: Funnel chart for publications of the proportion of MRSA carriage in neonate mothers in neonatal intensive care units

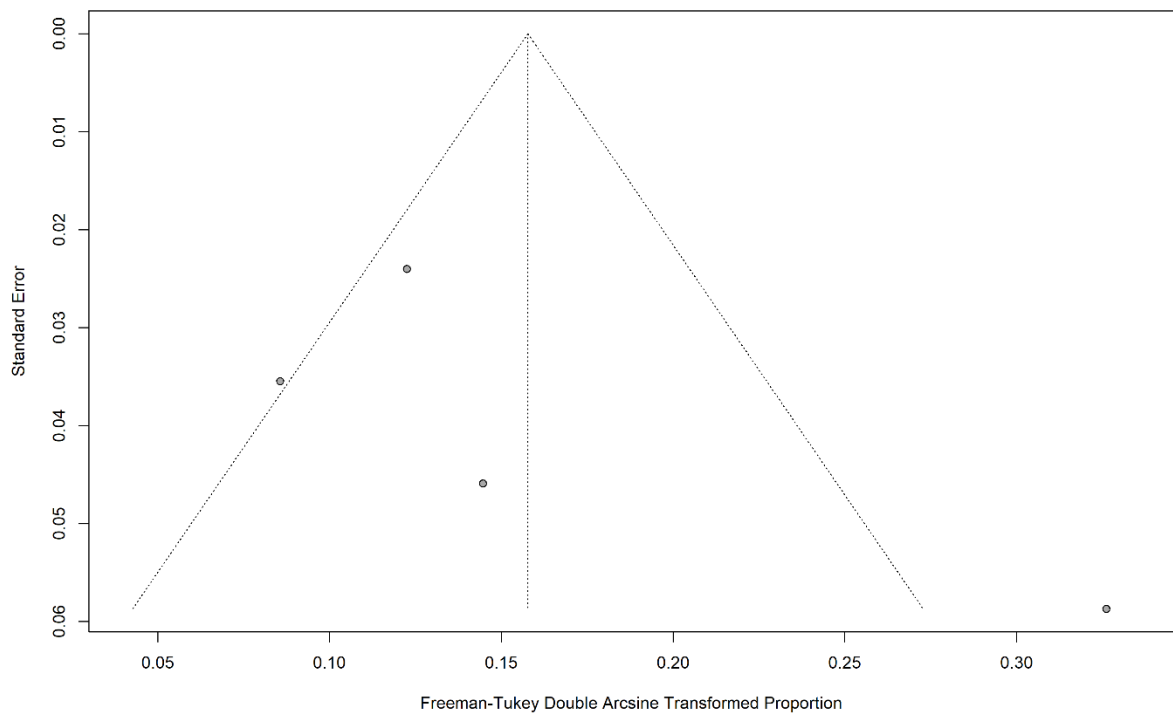

P Egger test: 0.315

Figure S2: Funnel chart for publications of the proportion of MRSA carriage in healthcare workers in neonatal intensive care units

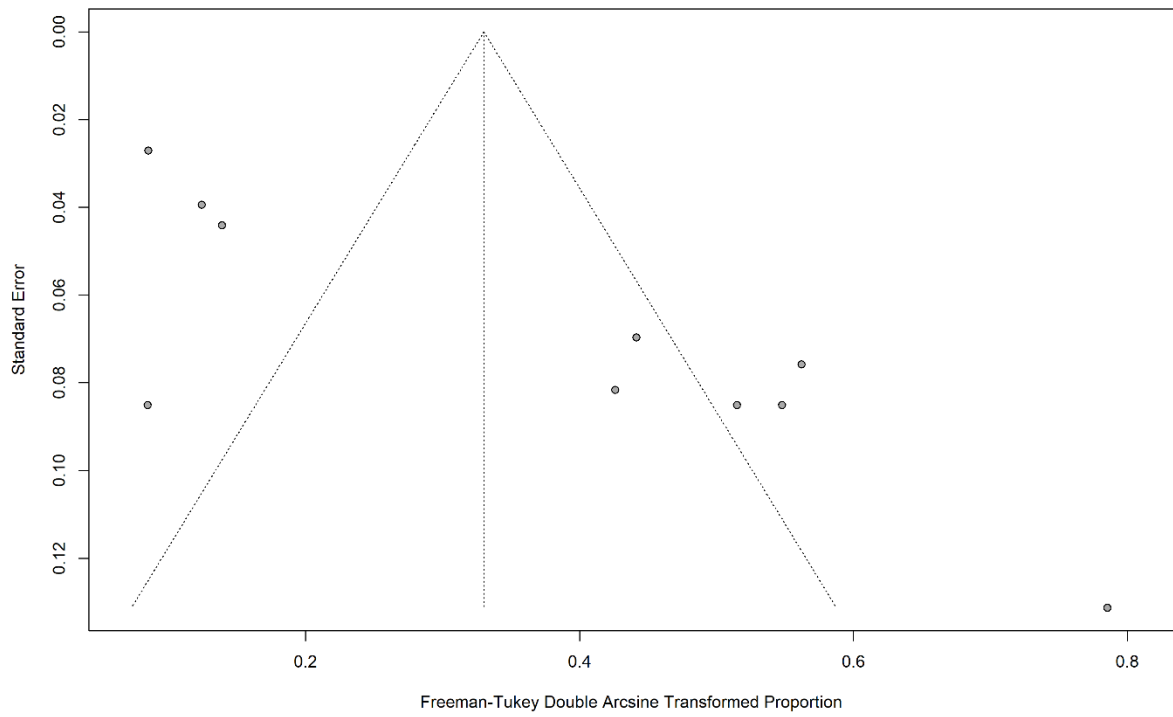

P Egger test: 0.004

Figure S3: Funnel chart for publications of the proportion of MRSA carriage in environmental surfaces in neonatal intensive care units

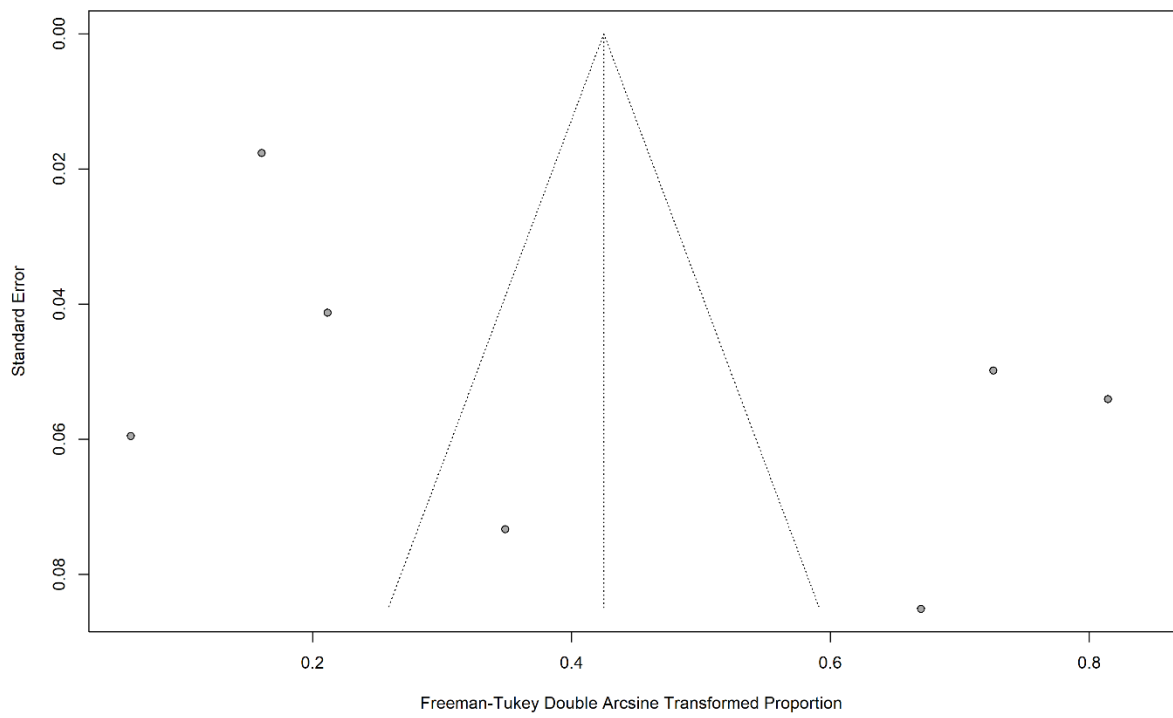

P Egger test: 0.134
